# Supplementary material for: Activation of GABA(A) receptors inhibits T cell proliferation
Source: PubMed Central journal article supplement (PMC8136847; doi:10.1371/journal.pone.0251632), 2021-05-20

Fig1A left panel uncropped

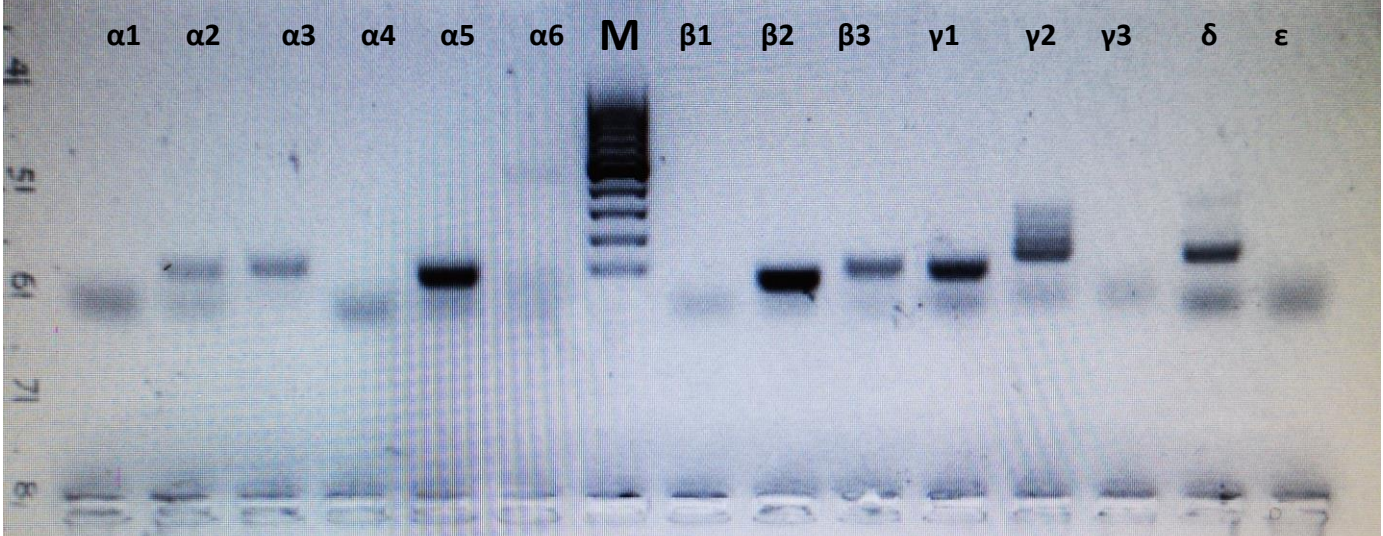

Fig1A right panel uncropped

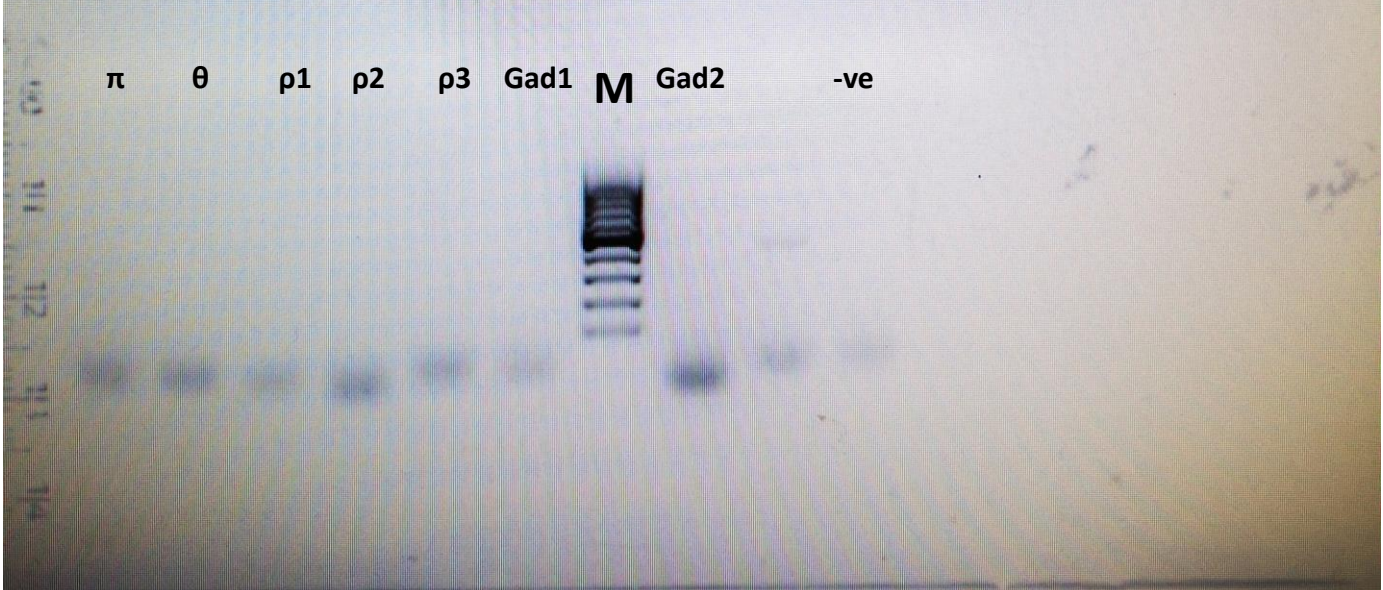

Fig1B left panel  
uncropped

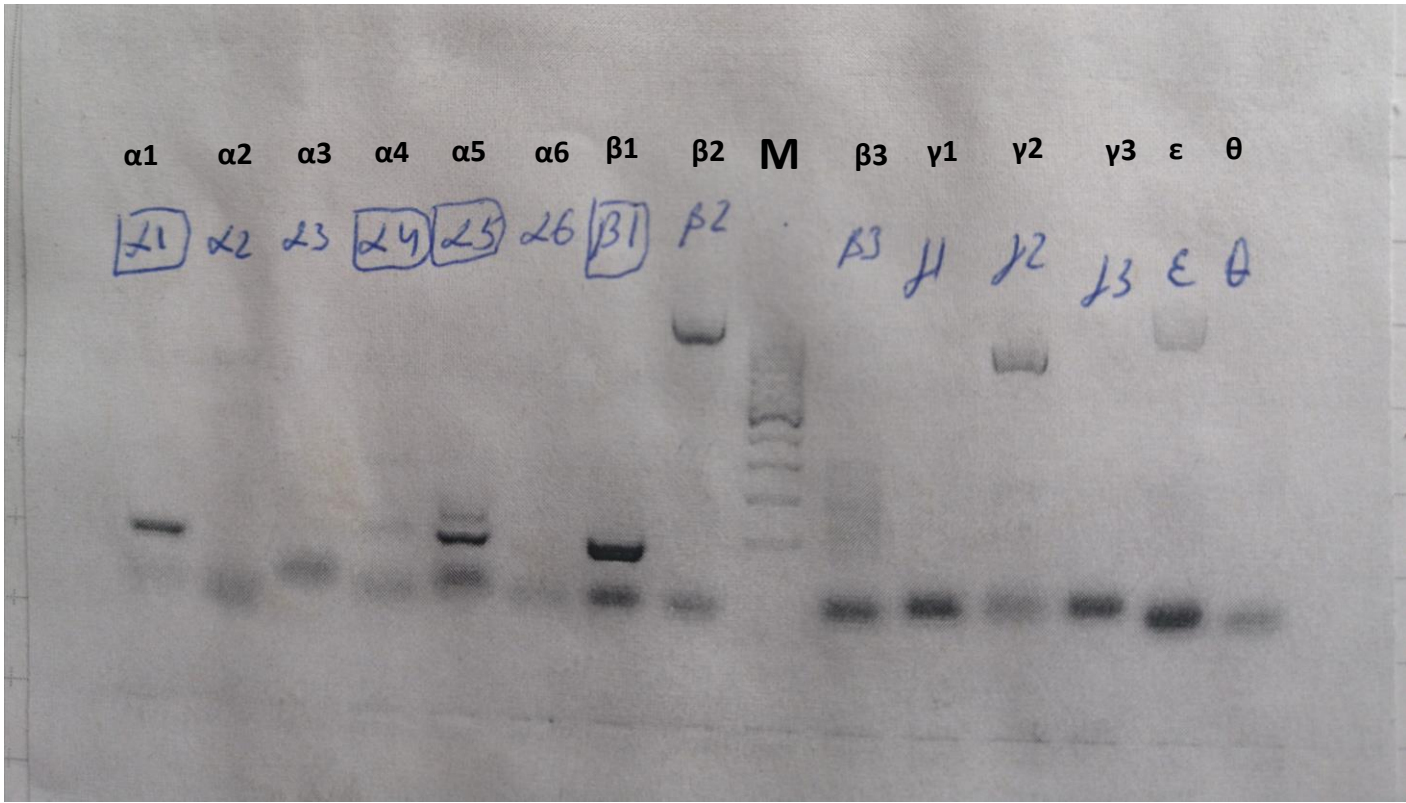

Fig1B right panel  
uncropped

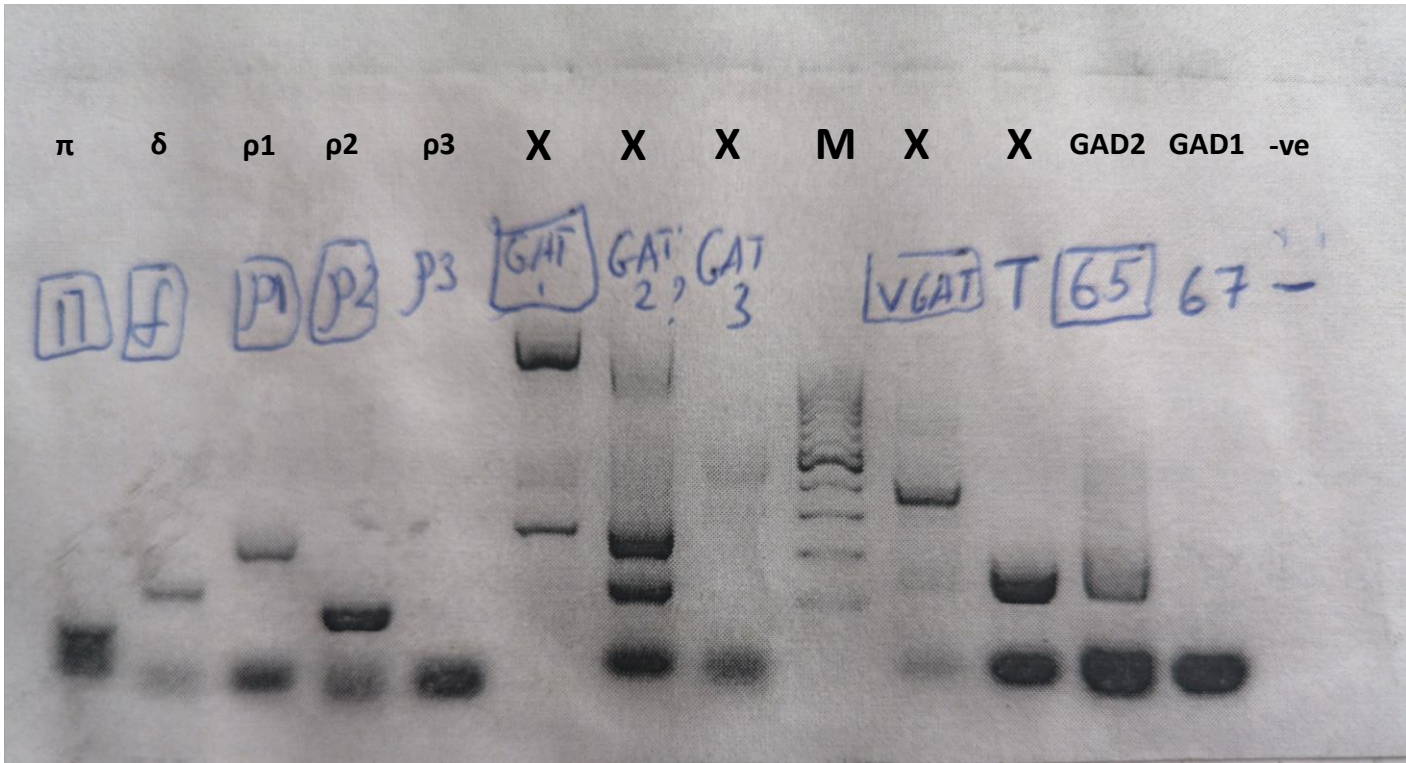

Supplement: pone.0251632.s002.pdf [file pone.0251632.s002.pdf]
